# Supplementary material
Source: PubMed Central journal article supplement (PMC3454459)
Supplement: NIHMS386919-supplement-ESI.pdf [file NIHMS386919-supplement-ESI.pdf]

## Electronic Supporting Information

### **Axial and equatorial ligand effects on biomimetic cysteine dioxygenase model complexes**

**Luis E. Gonzalez-Ovalle,<sup>a</sup> Matthew G. Quesne,<sup>a</sup> Devesh Kumar,<sup>\*b</sup> David P. Goldberg,<sup>\*c</sup> and Sam P. de Visser<sup>\*a</sup>**

<sup>a</sup> *Manchester Interdisciplinary Biocenter and School of Chemical Engineering and Analytical Science, University of Manchester, 131 Princess Street, Manchester M1 7DN, UK. Fax: +44 161306 5201; E-mail: [sam.devisser@manchester.ac.uk](mailto:sam.devisser@manchester.ac.uk)*

<sup>b</sup> *Department of Applied Physics, School of Physical Sciences, Babasaheb, Bhimrao Ambedkar University, Vidya Vihar, Rae Bareilly Road, Lucknow 226-025, India; E-mail: [dkclcre@yahoo.com](mailto:dkclcre@yahoo.com)*

<sup>c</sup> *Department of Chemistry, Johns Hopkins University, 3400 N. Charles Street, Baltimore, Maryland 21218, USA; E-mail: [dpg@jhu.edu](mailto:dpg@jhu.edu)*

Full Gaussian Reference:

Frisch, M. J.; Trucks, G. W.; Schlegel, H. B.; Scuseria, G. E.; Robb, M. A.; Cheeseman, J. R.; Montgomery, Jr., J. A.; Vreven, T.; Kudin, K. N.; Burant, J. C.; Millam, J. M.; Iyengar, S. S.; Tomasi, J.; Barone, V.; Mennucci, B.; Cossi, M.; Scalmani, G.; Rega N.; Petersson, G. A.; Nakatsuji, H.; Hada, M.; Ehara, M.; Toyota, K.; Fukuda, R.; Hasegawa, J.; Ishida, M.; Nakajima, T.; Honda, Y.; Kitao, O.; Nakai, N.; Klene, M.; Li, X.; Knox, J. E.; Hratchian, H. P.; Cross, J. B.; Adamo, C.; Jaramillo, J.; Gomperts, R.; Stratmann, R. E.; Yazyev, O.; Austin, A. J.; Cammi, R.; Pomelli, C.; Ochterski, J. W.; Ayala, P. Y.; Morokuma, K.; Voth, G. A.; Salvador, P.; Dannenberg, J. J.; Zakrzewski, V. G.; Dapprich, S.; Daniels, A. D.; Strain, M. C.; Farkas, O.; Malick, D. K.; Rabuck, A. D.; Raghavachari, K.; Foresman, J. B.; Ortiz, J. V.; Cui, Q.; Baboul, A. G.; Clifford, S.; Cioslowski, J.; Stefanov, B. B.; Liu, G.; Liashenko, A.; Piskorz, P.; Komaromi, I.; Martin, R. L.; Fox, D. J.; Keith, T.; Al-Laham, M. A.; Peng, C. Y.; Nanayakkara, A.; Challacombe, M.; Gill, P. M. W.; Johnson, B.; Chen, W.; Wong, M. W.; Gonzalez, C.; Pople, J. A. Gaussian 03, revision C.02; Gaussian, Inc.,

**Table S1: Absolute energies, zero point energies (ZPE), free energies in the gas-phase (G) and solvent energies (Esolv) with values in au for optimized geometries, of structures A<sub>X</sub> and B<sub>X</sub>, X = OTf or Cl.**

|             | E (land12dz) | ZPE (land12dz) | G (land12dz) | E (LACVP+*) | Esolv (LACVP+*) |
|-------------|--------------|----------------|--------------|-------------|-----------------|
| <b>AOTf</b> |              |                |              |             |                 |
| singlet     | -2536.19     | 0.82           | -2535.46     | -3313.37    | -3313.39        |
| triplet     | -2536.22     | 0.82           | -2535.49     | -3313.40    | -3313.43        |
| quintet     | -2536.23     | 0.82           | -2535.51     | -3313.42    | -3313.44        |
| septet      | -2536.23     | 0.82           | -2535.51     | -3313.42    | -3313.45        |
| <b>BOtf</b> |              |                |              |             |                 |
| singlet     | -2536.17     | 0.82           | -2535.44     | -3313.35    | -3313.39        |
| triplet     | -2536.20     | 0.82           | -2535.48     | -3313.37    | -3313.40        |
| quintet     | -2536.20     | 0.81           | -2535.49     | -3313.38    | -3313.41        |
| septet      | -2536.22     | 0.81           | -2535.51     | -3313.40    | -3313.43        |
| <b>ACl</b>  |              |                |              |             |                 |
| singlet     | -1977.97     | 0.80           | -1977.25     | -2812.03    | -2812.06        |
| triplet     | -1977.99     | 0.80           | -1977.28     | -2812.05    | -2812.08        |
| quintet     | -1978.01     | 0.79           | -1977.30     | -2812.07    | -2812.11        |
| septet      | -1978.01     | 0.79           | -1977.30     | -2812.08    | -2812.11        |
| <b>BCl</b>  |              |                |              |             |                 |
| singlet     | -1977.96     | 0.80           | -1977.25     | -2812.03    | -2812.06        |
| triplet     | -1977.99     | 0.80           | -1977.28     | -2812.06    | -2812.08        |
| quintet     | -1978.00     | 0.79           | -1977.26     | -2812.02    | -2812.09        |
| septet      | -1978.02     | 0.79           | -1977.32     | -2812.10    | -2812.12        |

**Table S2: Group spin densities and charges of optimized geometries****Table S2a: A<sub>Cl</sub>/B<sub>Cl</sub> UB3LYP/BS1 results.**

| Spin densities        |      |      |      |       |       |       | Charges |       |       |       |       |      |
|-----------------------|------|------|------|-------|-------|-------|---------|-------|-------|-------|-------|------|
|                       | Fe   | O1   | O2   | Cl    | SPh   | BIP   | Fe      | O1    | O2    | Cl    | SPh   | BIP  |
| <b>A<sub>Cl</sub></b> |      |      |      |       |       |       |         |       |       |       |       |      |
| Singlet               | 0.00 | 0.00 | 0.00 | 0.00  | 0.00  | 0.00  | -0.08   | -0.17 | -0.18 | -0.34 | -0.01 | 0.78 |
| Triplet               | 0.98 | 0.31 | 0.60 | -0.02 | 0.17  | -0.04 | -0.11   | -0.23 | -0.18 | -0.34 | -0.03 | 0.89 |
| Quintet               | 3.46 | 0.21 | 0.40 | 0.03  | -0.22 | 0.12  | 0.14    | -0.20 | -0.14 | -0.37 | -0.04 | 0.60 |
| Septet                | 3.76 | 0.80 | 0.90 | 0.12  | 0.31  | 0.11  | 0.10    | -0.09 | -0.06 | -0.38 | -0.19 | 0.61 |
| <b>B<sub>Cl</sub></b> |      |      |      |       |       |       |         |       |       |       |       |      |
| Singlet               | 0.00 | 0.00 | 0.00 | 0.00  | 0.00  | 0.00  | -0.16   | -0.14 | -0.22 | -0.32 | -0.11 | 0.94 |
| Triplet               | 1.02 | 0.47 | 0.61 | 0.02  | 0.00  | -0.12 | -0.15   | -0.17 | -0.18 | -0.27 | -0.11 | 0.88 |
| Quintet               | 2.02 | 0.58 | 0.65 | -0.03 | 0.89  | -0.11 | 0.22    | -0.21 | -0.20 | -0.35 | 0.02  | 0.52 |
| Septet                | 3.69 | 0.97 | 0.96 | 0.14  | 0.20  | 0.04  | 0.12    | 0.00  | -0.03 | -0.34 | -0.25 | 0.50 |

**Table S2b: A<sub>Cl</sub>/B<sub>Cl</sub> UB3LYP/BS2 results.**

| Spin densities        |      |      |      |       |       |       | Charges |       |       |       |       |       |
|-----------------------|------|------|------|-------|-------|-------|---------|-------|-------|-------|-------|-------|
|                       | Fe   | O1   | O2   | Cl    | SPh   | BIP   | Fe      | O1    | O2    | Cl    | SPh   | BIP   |
| <b>A<sub>Cl</sub></b> |      |      |      |       |       |       |         |       |       |       |       |       |
| singlet               | 0.00 | 0.00 | 0.00 | 0.00  | 0.00  | 0.00  | -1.59   | 0.80  | 0.26  | -0.54 | -0.33 | 1.40  |
| triplet               | 0.91 | 0.33 | 0.59 | -0.02 | 0.20  | -0.01 | -1.45   | 0.45  | 0.20  | -0.85 | 0.19  | 1.46  |
| quintet               | 3.07 | 0.19 | 0.37 | 0.02  | 0.02  | 0.33  | 1.79    | 0.49  | 0.37  | -0.78 | -1.06 | -0.82 |
| septet                | 3.35 | 0.79 | 0.89 | 0.12  | 0.34  | 0.50  | 2.66    | 0.00  | 0.19  | -0.70 | -1.64 | -0.51 |
| <b>B<sub>Cl</sub></b> |      |      |      |       |       |       |         |       |       |       |       |       |
| singlet               | 0.00 | 0.00 | 0.00 | 0.00  | 0.00  | 0.00  | -2.73   | 1.24  | -0.07 | -1.65 | -0.04 | 3.25  |
| triplet               | 1.10 | 0.45 | 0.57 | 0.00  | 0.02  | -0.14 | -2.57   | 0.75  | -0.08 | -1.73 | -0.02 | 3.65  |
| quintet               | 3.47 | 0.53 | 0.55 | 0.15  | -1.05 | 0.34  | 2.13    | 0.26  | -0.10 | -2.12 | -0.02 | -0.14 |
| septet                | 3.52 | 0.99 | 0.97 | 0.14  | 0.16  | 0.21  | 0.95    | -0.03 | 0.16  | -1.64 | -0.27 | 0.84  |

**Table S2c: A<sub>OTF</sub>/B<sub>OTF</sub> UB3LYP/BS1 results.**

| Spin densities         |       |      |      |       |       |       | Charges |       |       |       |       |      |
|------------------------|-------|------|------|-------|-------|-------|---------|-------|-------|-------|-------|------|
|                        | Fe    | O1   | O2   | Otf   | SPh   | BIP   | Fe      | O1    | O2    | Otf   | SPh   | BIP  |
| <b>A<sub>OTF</sub></b> |       |      |      |       |       |       |         |       |       |       |       |      |
| singlet                | 0.00  | 0.00 | 0.00 | 0.00  | 0.00  | 0.00  | 0.16    | -0.15 | -0.17 | -0.73 | 0.04  | 0.85 |
| triplet                | 0.87  | 0.35 | 0.58 | -0.01 | 0.23  | -0.02 | 0.07    | -0.17 | -0.21 | -0.72 | 0.03  | 0.99 |
| quintet                | 3.57  | 0.20 | 0.30 | 0.04  | -0.25 | 0.13  | 0.38    | -0.16 | -0.11 | -0.75 | -0.01 | 0.65 |
| septet                 | 3.74  | 0.82 | 0.93 | 0.05  | 0.33  | 0.13  | 0.37    | -0.07 | -0.04 | -0.76 | -0.16 | 0.65 |
| <b>B<sub>OTF</sub></b> |       |      |      |       |       |       |         |       |       |       |       |      |
|                        | Fe    | O1   | O2   | Otf   | SPh   | BIP   | Fe      | O1    | O2    | Otf   | SPh   | BIP  |
| singlet                | 0.00  | 0.00 | 0.00 | 0.00  | 0.00  | 0.00  | 0.14    | -0.14 | -0.14 | -0.70 | -0.10 | 0.94 |
| triplet                | -0.07 | 0.45 | 0.61 | 0.00  | 1.00  | 0.01  | 0.43    | -0.19 | -0.22 | -0.72 | 0.01  | 0.70 |
| quintet                | 2.06  | 0.55 | 0.64 | 0.01  | 1.00  | -0.24 | 0.51    | -0.21 | -0.21 | -0.71 | 0.01  | 0.60 |
| septet                 | 3.69  | 0.53 | 0.61 | 0.08  | 1.00  | 0.09  | 0.72    | -0.26 | -0.22 | -0.73 | 0.01  | 0.48 |

**Table S2d: A<sub>OTF</sub>/B<sub>OTF</sub> UB3LYP/BS2 results.**

| Spin densities         |      |      |      |       |      |       | Charges |      |       |       |       |       |
|------------------------|------|------|------|-------|------|-------|---------|------|-------|-------|-------|-------|
|                        | Fe   | O1   | O2   | Otf   | SPh  | BIP   | Fe      | O1   | O2    | Otf   | SPh   | BIP   |
| <b>A<sub>OTF</sub></b> |      |      |      |       |      |       |         |      |       |       |       |       |
| singlet                | 0.00 | 0.00 | 0.00 | 0.00  | 0.00 | 0.00  | -2.17   | 1.03 | 0.21  | 0.07  | -0.96 | 1.81  |
| triplet                | 0.87 | 0.35 | 0.57 | -0.01 | 0.28 | -0.06 | -2.67   | 1.06 | -0.01 | 0.40  | -1.22 | 2.43  |
| quintet                | 3.30 | 0.15 | 0.20 | 0.03  | 0.01 | 0.30  | 1.45    | 0.49 | 0.36  | 0.04  | -1.66 | -0.68 |
| septet                 | 3.46 | 0.83 | 0.95 | 0.04  | 0.32 | 0.40  | 1.24    | 0.03 | 0.28  | -0.11 | -1.30 | -0.14 |
| <b>B<sub>OTF</sub></b> |      |      |      |       |      |       |         |      |       |       |       |       |
| singlet                | 0.00 | 0.00 | 0.00 | 0.00  | 0.00 | 0.00  | -3.58   | 0.88 | 0.15  | 0.37  | -0.49 | 2.67  |
| triplet                | 0.00 | 0.48 | 0.54 | -0.01 | 1.00 | -0.01 | 0.00    | 0.00 | 0.00  | 0.00  | 0.00  | 2.70  |
| quintet                | 2.31 | 0.55 | 0.57 | -0.04 | 1.00 | -0.39 | -0.40   | 0.05 | -0.08 | 0.07  | -0.04 | 0.40  |
| septet                 | 3.72 | 0.54 | 0.54 | 0.08  | 1.01 | 0.12  | -0.12   | 0.14 | -0.10 | -0.02 | -0.09 | 0.19  |

**Table S3: Absolute energies, zero point energies (ZPE), free energies in the gas-phase (G) and solvent energies (Esolv) with values in au for optimized geometries, of structures  $A_{Sph}$  and  $C_{Cl,Cl}$ .**

|                               | E (land12dz) | ZPE (6-311g) | G (6-311g) | E (6-311+g*) | Esolv (6-311+g*) |
|-------------------------------|--------------|--------------|------------|--------------|------------------|
| <b><math>C_{Cl,Cl}</math></b> |              |              |            |              |                  |
| singlet                       | -1751.25     | 0.70         | -1750.63   | -2642.34     | -2642.38         |
| triplet                       | -1751.24     | 0.70         | -1750.62   | -2642.36     | -2642.43         |
| quintet                       | -1751.27     | 0.70         | -1750.65   | -2642.42     | -2642.45         |
| <b><math>A_{Sph}</math></b>   |              |              |            |              |                  |
| singlet                       | -2204.70     | 0.89         | -2203.90   | -2981.68     | -2981.71         |
| triplet                       | -2204.73     | 0.89         | -2203.93   | -2981.71     | -2981.74         |
| quintet                       | -2204.74     | 0.89         | -2203.95   | -2981.73     | -2981.76         |

**Table S4: Group spin densities and charges of optimized geometries.**

|                               | Spin densities |       |       |       |       |       | Charge |       |       |       |       |      |
|-------------------------------|----------------|-------|-------|-------|-------|-------|--------|-------|-------|-------|-------|------|
|                               | Fe             | O1    | O2    | Cl1   | Cl2   | CDO   | Fe     | O1    | O2    | Cl1   | Cl2   | CDO  |
| <b><math>C_{Cl,Cl}</math></b> |                |       |       |       |       |       |        |       |       |       |       |      |
| singlet                       | 1.74           | -0.71 | -0.89 | 0.00  | -0.03 | -0.11 | 0.00   | -0.10 | -0.04 | -0.36 | -0.28 | 0.78 |
| triplet                       | 2.07           | -0.05 | -0.06 | 0.10  | 0.03  | -0.09 | 0.08   | -0.03 | -0.04 | -0.37 | -0.32 | 0.68 |
| quintet                       | 3.80           | 0.01  | -0.40 | 0.16  | 0.24  | 0.18  | 0.26   | -0.18 | -0.08 | -0.37 | -0.27 | 0.64 |
| <b><math>A_{Sph}</math></b>   |                |       |       |       |       |       |        |       |       |       |       |      |
| singlet                       | 0.00           | 0.00  | 0.00  | 0.00  | 0.00  | 0.00  | -0.13  | -0.16 | -0.23 | -0.24 | -0.08 | 0.83 |
| triplet                       | 0.79           | 0.45  | 0.60  | 0.02  | 0.23  | -0.09 | -0.20  | -0.18 | -0.20 | -0.17 | -0.09 | 0.84 |
| quintet                       | 3.22           | 0.33  | 0.55  | -0.08 | -0.15 | 0.12  | 0.07   | -0.22 | -0.22 | -0.19 | -0.05 | 0.61 |

**Table S5. Absolute and relative energies, zero point energies and free energies of UB3LYP/BS1 optimized geometries of  $^7[\text{Fe}^{\text{III}}\text{O}_2(\text{LN}_3\text{S})]$ . M7 = septet spin state. Absolute energies in au and relative energies in kcal mol<sup>-1</sup>.**

(a)

| B1 -> LACVP |              |              |              |              |                  |              |
|-------------|--------------|--------------|--------------|--------------|------------------|--------------|
| Multip      | E            | E+ZPE        | G            | $\Delta E^a$ | $\Delta E+ZPC^a$ | $\Delta G^a$ |
| M7          | -1646.868998 | -1646.517425 | -1646.577093 | -0.91        | -1.76            | -4.62        |

<sup>a</sup> with respect to <sup>1</sup>A.

(b)

| B1 -> LACVP (Solv = Chlorobenzene) |                  |                              |                                  |
|------------------------------------|------------------|------------------------------|----------------------------------|
| Multip                             | E <sub>sol</sub> | $\Delta(E+E_{\text{sol}})^a$ | $\Delta(E+ZPC+E_{\text{sol}})^a$ |
| M7                                 | -39.09           | -0.94                        | -1.79                            |

<sup>a</sup> with respect to <sup>1</sup>A.

(c)

| B2 -> LACV3P+* |              |              |              |                              |                  |                                  |
|----------------|--------------|--------------|--------------|------------------------------|------------------|----------------------------------|
| Multip         | E            | E+ZPE        | $\Delta E^a$ | $\Delta(E+E_{\text{sol}})^a$ | $\Delta E+ZPC^a$ | $\Delta(E+ZPC+E_{\text{sol}})^a$ |
| M7             | -1647.470770 | -1647.119197 | -6.07        | -6.11                        | -6.92            | -6.95                            |

<sup>a</sup> with respect to <sup>1</sup>A.

**Table S6. Group spin densities and group charges of UB3LYP/BS1 optimized geometries of  $^7[\text{Fe}^{\text{III}}\text{O}_2(\text{LN}_3\text{S})]$ . M7 = septet spin state.**

|    | Spin densities |      |      |      |      | Charges |      |       |      |      |
|----|----------------|------|------|------|------|---------|------|-------|------|------|
|    | Fe             | O1   | O2   | S    | Rest | Fe      | O1   | O2    | S    | Rest |
| M7 | 3.63           | 0.96 | 0.82 | 0.36 | 0.23 | 0.72    | 0.01 | -0.15 | 0.10 | 0.32 |

**Table S7. Group spin densities and group charges of UB3LYP/BS2//UB3LYP/BS1 calculations of  $^7[\text{Fe}^{\text{III}}\text{O}_2(\text{LN}_3\text{S})]$ . M7 = septet spin state.**

|    | Spin densities |      |      |      |      | Charges |      |      |       |      |
|----|----------------|------|------|------|------|---------|------|------|-------|------|
|    | Fe             | O1   | O2   | S    | Rest | Fe      | O1   | O2   | S     | Rest |
| M7 | 3.66           | 0.97 | 0.72 | 0.33 | 0.31 | 0.02    | 0.34 | 0.35 | -0.48 | 0.77 |

**Table S8. Group spin densities and group charges of UB3LYP/BS1 single point in solvent chlorobenzene calculations of  $^7[\text{Fe}^{\text{III}}\text{O}_2(\text{LN}_3\text{S})]$ . M7 = septet spin state.**

|    | Spin densities |      |      |      |      | Charges |       |       |       |      |
|----|----------------|------|------|------|------|---------|-------|-------|-------|------|
|    | Fe             | O1   | O2   | S    | Rest | Fe      | O1    | O2    | S     | Rest |
| M7 | 3.68           | 0.95 | 0.82 | 0.31 | 0.24 | 0.77    | -0.01 | -0.14 | -0.01 | 0.39 |

**Table S9. Important bond distances and angles of UB3LYP/BS1 optimized geometries of  $^7[\text{Fe}^{\text{III}}\text{O}_2(\text{LN}_3\text{S})]$ . M7 = septet spin state.**

|    | Fe-N <sub>av</sub> | Fe-S  | Fe-O2 | O1-O2 | O1-S  | Ang(FeO2O1) |
|----|--------------------|-------|-------|-------|-------|-------------|
| M7 | 2.166              | 2.336 | 2.075 | 1.278 | 4.364 | 179.9       |

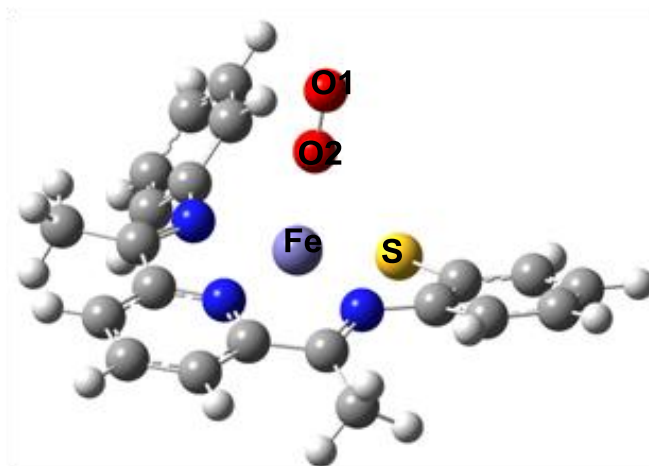

**Figure S1. Optimized geometry of  $^7[\text{Fe}^{\text{III}}\text{O}_2(\text{LN}_3\text{S})]$  at UB3LYP/BS1 level of theory.**

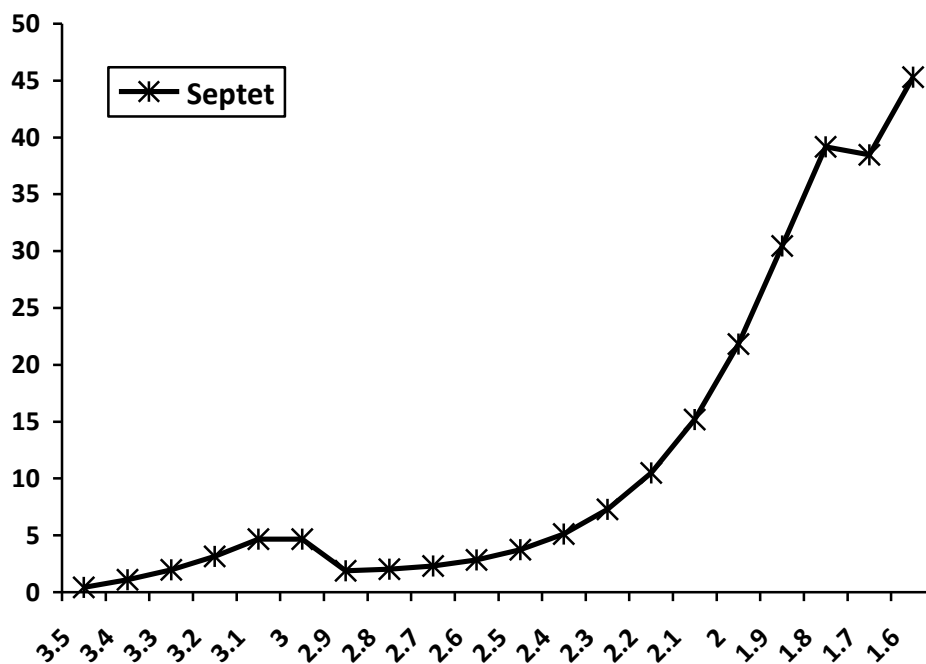

**Figure S2. Geometry scan for the S–O bond formation step starting from  $^7[\text{Fe}^{\text{III}}\text{O}_2(\text{LN}_3\text{S})]$  at the left-hand-side. Each point represents a full geometry optimization with fixed S–O distance at UB3LYP/BS1.**

**Table S10. Absolute (in au) and relative (in kcal mol<sup>-1</sup>) energies of optimized UB3LYP-D/BS1 and subsequent single point UB3LYP-D/BS2 calculations.**

|                        | E(B1, au)   | E(B2, au)   | $\Delta E(B1)$ | $\Delta E+ZPE(B1)$ | $\Delta E(B2)$ | $\Delta E+ZPE(B2)$ |
|------------------------|-------------|-------------|----------------|--------------------|----------------|--------------------|
| <b>A<sub>OTf</sub></b> |             |             |                |                    |                |                    |
| triplet                | -2534.65186 | -3311.73613 | 16.33          | 18.50              | 29.10          | 31.27              |
| quintet                | -2534.67789 | -3311.78251 | 0.00           | 0.00               | 0.00           | 0.00               |
| septet                 | -2534.67638 | -3311.77972 | 0.95           | 0.65               | 1.75           | 1.46               |
| <b>B<sub>OTf</sub></b> |             |             |                |                    |                |                    |
| triplet                | -2534.58061 | -3311.66188 | 61.04          | 61.03              | 75.70          | 75.68              |
| quintet                | -2534.60754 | -3311.71911 | 44.14          | 43.55              | 39.79          | 39.19              |
| septet                 | -2534.63194 | -3311.72624 | 28.83          | 27.42              | 35.31          | 33.90              |
| <b>A<sub>Cl</sub></b>  |             |             |                |                    |                |                    |
| triplet                | -1976.63141 | -2810.60531 | 25.48          | 27.16              | 37.50          | 39.19              |
| quintet                | -1976.67201 | -2810.66507 | 0.00           | 0.00               | 0.00           | 0.00               |
| septet                 | -1976.67173 | -2810.66429 | 0.18           | -0.11              | 0.49           | 0.21               |
| <b>B<sub>Cl</sub></b>  |             |             |                |                    |                |                    |
| triplet                | -1976.63585 | -2810.61118 | 22.69          | 24.58              | 33.82          | 35.71              |
| quintet                | -1976.63689 | -2810.64399 | 22.04          | 20.96              | 13.23          | 12.15              |
| septet                 | -1976.68242 | -2810.67811 | -6.53          | -7.55              | -8.18          | -9.21              |

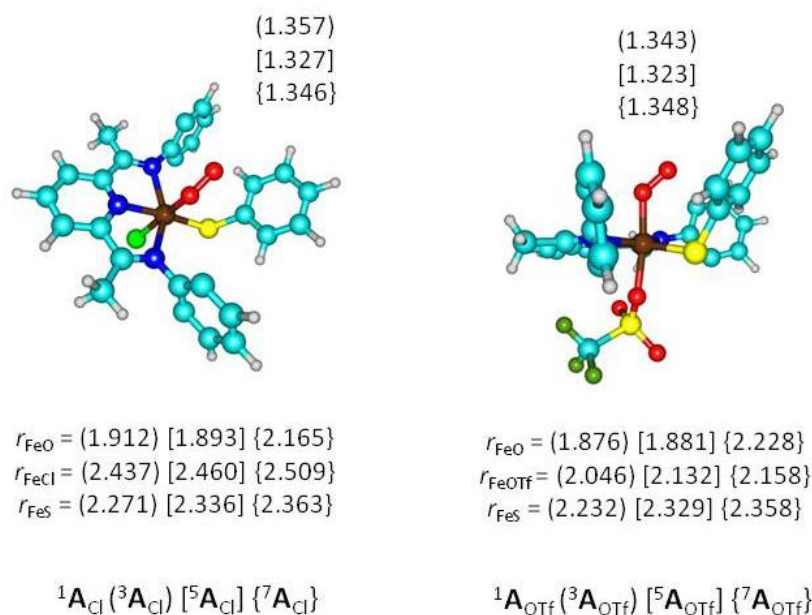

**Figure S3.** B3LYP-D/B1 optimized geometries of <sup>3,5,7</sup>A<sub>Cl</sub> (left-hand-side) and <sup>3,5,7</sup>A<sub>OTf</sub> (right-hand-side) with bond lengths in angstroms. H-atoms and isopropyl groups have been hidden.



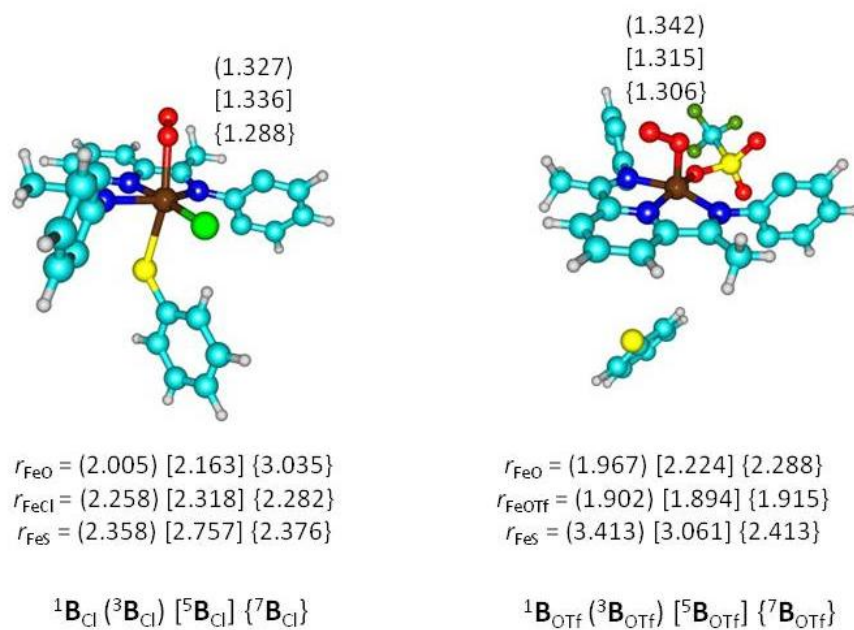

**Figure S4.** B3LYP-D/B1 optimized geometries of  ${}^{3,5,7}\mathbf{B}_{\text{Cl}}$  (left-hand-side) and  ${}^{3,5,7}\mathbf{B}_{\text{OTf}}$  (right-hand-side) with bond lengths in angstroms. H-atoms and isopropyl groups have been hidden.

# Cartesian Coordinates:

## Ac1,5

|    |              |              |              |
|----|--------------|--------------|--------------|
| Fe | -0.044338000 | -0.513358000 | 0.236930000  |
| C  | -2.439307000 | -2.057915000 | -0.924660000 |
| C  | -1.207044000 | -2.843571000 | -1.244090000 |
| C  | -1.233620000 | -4.128224000 | -1.822748000 |
| H  | -2.174850000 | -4.603062000 | -2.072629000 |
| C  | -0.017945000 | -4.791241000 | -2.059439000 |
| H  | -0.013713000 | -5.785387000 | -2.496647000 |
| C  | 1.191101000  | -4.163919000 | -1.719614000 |
| H  | 2.135061000  | -4.667628000 | -1.888467000 |
| C  | 1.154809000  | -2.874451000 | -1.148709000 |
| C  | 2.381779000  | -2.117862000 | -0.752171000 |
| C  | -3.778766000 | -2.640010000 | -1.322961000 |
| H  | -4.593189000 | -1.969632000 | -1.046019000 |
| H  | -3.936813000 | -3.602368000 | -0.818760000 |
| C  | -3.824018000 | -2.817832000 | -2.404701000 |
| C  | 3.719282000  | -2.801795000 | -0.944736000 |
| H  | 3.871355000  | -3.091556000 | -1.991263000 |
| H  | 3.757414000  | -3.715413000 | -0.337044000 |
| H  | 4.540102000  | -2.151710000 | -0.641164000 |
| C  | -3.367167000 | -0.021781000 | -0.016055000 |
| C  | -3.813410000 | 0.881157000  | -1.024023000 |
| C  | -4.865450000 | 1.763240000  | -0.696415000 |
| H  | -5.221187000 | 2.461952000  | -1.449272000 |
| C  | -5.457590000 | 1.758427000  | 0.574604000  |
| H  | -6.267261000 | 2.447497000  | 0.802893000  |
| C  | -5.000294000 | 0.859093000  | 1.548818000  |
| H  | -5.460297000 | 0.854187000  | 2.533304000  |
| C  | -3.950923000 | -0.044136000 | 1.281086000  |
| C  | -3.224431000 | 0.932783000  | -2.440837000 |
| H  | -2.343797000 | 0.285544000  | -2.481204000 |
| C  | -4.251400000 | 0.431891000  | -3.493415000 |
| H  | -4.599564000 | -0.586343000 | -3.277347000 |
| H  | -3.800067000 | 0.434009000  | -4.494898000 |
| H  | -5.134888000 | 1.083287000  | -3.523312000 |
| C  | -2.735302000 | 2.357022000  | -2.810065000 |
| H  | -3.568375000 | 3.071710000  | -2.852946000 |
| H  | -2.255580000 | 2.343461000  | -3.797755000 |
| H  | -2.001016000 | 2.721062000  | -2.085783000 |
| C  | -3.518813000 | -1.038357000 | 2.362797000  |
| C  | -2.592445000 | -1.526625000 | 2.048586000  |
| C  | -3.205830000 | -0.341763000 | 3.710144000  |
| H  | -2.434128000 | 0.424036000  | 3.577793000  |
| H  | -2.826875000 | -1.081358000 | 4.426702000  |
| H  | -4.097344000 | 0.127811000  | 4.148953000  |
| C  | -4.596499000 | -2.140691000 | 2.558296000  |
| H  | -5.543183000 | -1.712121000 | 2.915315000  |
| H  | -4.253080000 | -2.872619000 | 3.300918000  |
| H  | -4.805384000 | -2.677963000 | 1.622917000  |
| C  | 3.340809000  | -0.066968000 | 0.079310000  |
| C  | 3.831372000  | -0.039061000 | 1.415311000  |
| C  | 4.912730000  | 0.819184000  | 1.705703000  |
| H  | 5.298592000  | 0.853176000  | 2.720735000  |
| C  | 5.494851000  | 1.623463000  | 0.716305000  |
| H  | 6.327479000  | 2.278192000  | 0.962123000  |
| C  | 4.997529000  | 1.577533000  | -0.593960000 |
| C  | 5.451215000  | 2.202281000  | -1.358383000 |
| C  | 3.916498000  | 0.741278000  | -0.945839000 |
| C  | 3.273788000  | -0.939455000 | 2.521358000  |
| H  | 2.330369000  | -1.375887000 | 2.184202000  |
| C  | 2.955215000  | -0.158222000 | 3.819756000  |
| H  | 3.860492000  | 0.251067000  | 4.289597000  |
| H  | 2.475840000  | -0.830229000 | 4.542650000  |
| H  | 2.261078000  | 0.663846000  | 3.616551000  |
| C  | 4.254144000  | -2.106661000 | 2.825501000  |
| H  | 5.208888000  | -1.729952000 | 3.217971000  |
| H  | 4.473164000  | -2.702110000 | 1.929321000  |
| H  | 3.816507000  | -2.775754000 | 3.577591000  |
| C  | 3.448101000  | 0.723518000  | -2.408944000 |
| C  | 2.471020000  | 0.232187000  | -2.457609000 |
| C  | 4.441439000  | -0.069766000 | -3.304684000 |
| H  | 5.426171000  | 0.416352000  | -3.314220000 |
| H  | 4.073826000  | -0.105287000 | -4.339234000 |
| H  | 4.585087000  | -1.099439000 | -2.958139000 |
| C  | 3.265386000  | 2.149164000  | -2.989944000 |
| H  | 4.226293000  | 2.671325000  | -3.090883000 |
| H  | 2.601877000  | 2.748080000  | -2.361247000 |
| H  | 2.816768000  | 2.087025000  | -3.990138000 |
| N  | 2.206028000  | -0.928236000 | -0.249071000 |
| N  | -0.028134000 | -2.251166000 | -0.933620000 |
| N  | -2.262260000 | -0.925660000 | -0.309751000 |
| S  | -0.078799000 | 1.246288000  | 1.815396000  |
| C  | -0.006299000 | 2.883967000  | 1.025593000  |
| C  | -1.189505000 | 3.643219000  | 0.850042000  |
| C  | -2.145525000 | 3.212597000  | 1.135258000  |
| H  | -1.123192000 | 4.940151000  | 0.315384000  |
| H  | -2.036107000 | 5.517625000  | 0.187074000  |

|    |              |              |              |
|----|--------------|--------------|--------------|
| C  | 0.121865000  | 5.494475000  | -0.053942000 |
| H  | 0.169937000  | 6.500517000  | -0.465377000 |
| C  | 1.299875000  | 4.740827000  | 0.111808000  |
| C  | 2.261631000  | 5.160652000  | -0.174247000 |
| C  | 1.238789000  | 3.440048000  | 0.644330000  |
| H  | 2.143786000  | 2.853672000  | 0.771293000  |
| O  | -0.240781000 | 0.709008000  | -1.356059000 |
| O  | 0.543488000  | 1.738030000  | -1.683714000 |
| Cl | -0.094841000 | -2.123802000 | 2.066046000  |

## Ac1,7

|    |              |              |              |
|----|--------------|--------------|--------------|
| Fe | -0.031617000 | -0.617272000 | 0.346964000  |
| C  | -2.425304000 | -2.018341000 | -0.939860000 |
| C  | -1.211600000 | -2.796406000 | -1.327658000 |
| C  | -1.248133000 | -4.028242000 | -2.011936000 |
| H  | -2.191980000 | -4.477949000 | -2.296717000 |
| C  | -0.035274000 | -4.670932000 | -2.314267000 |
| H  | -0.038260000 | -5.623065000 | -2.836715000 |
| C  | 1.181301000  | -4.078992000 | -1.933348000 |
| H  | 2.121756000  | -4.568663000 | -2.156869000 |
| C  | 1.152139000  | -2.844648000 | -1.253179000 |
| C  | 2.369404000  | -2.111102000 | -0.797205000 |
| C  | -3.778742000 | -2.592910000 | -1.297835000 |
| H  | -4.585318000 | -1.944197000 | -0.955289000 |
| H  | -3.899723000 | -3.576539000 | -0.825472000 |
| C  | -3.876647000 | -2.729874000 | -2.381852000 |
| H  | 3.717302000  | -2.748291000 | -1.055598000 |
| H  | 3.876246000  | -2.921666000 | -2.126880000 |
| H  | 3.766317000  | -3.721610000 | -0.549768000 |
| H  | 4.528142000  | -2.123319000 | -0.680618000 |
| C  | -3.329217000 | -0.004349000 | 0.039094000  |
| C  | -3.851652000 | 0.866447000  | -0.962127000 |
| C  | -4.892869000 | 1.745028000  | -0.592592000 |
| H  | -5.303246000 | 2.420538000  | -1.338858000 |
| C  | -5.406496000 | 1.767398000  | 0.711248000  |
| H  | -6.208071000 | 2.454532000  | 0.971251000  |
| C  | -4.879980000 | 0.898009000  | 1.676985000  |
| H  | -5.278518000 | 0.914316000  | 2.687515000  |
| C  | -3.837009000 | 0.000836000  | 1.368578000  |
| C  | -3.356769000 | 0.900577000  | -2.415564000 |
| H  | -2.479737000 | 0.252042000  | -2.508893000 |
| C  | -4.444944000 | 0.378934000  | -3.395507000 |
| H  | -4.774743000 | -0.636546000 | -3.145496000 |
| H  | -4.057435000 | 0.370877000  | -4.423205000 |
| C  | -5.330824000 | 1.027050000  | -3.377163000 |
| C  | -2.915347000 | 2.325569000  | -2.840905000 |
| H  | -3.766160000 | 3.019804000  | -2.852538000 |
| H  | -2.491040000 | 2.301030000  | -3.853292000 |
| C  | -2.154295000 | 2.726776000  | -2.165487000 |
| C  | -3.336276000 | -0.965666000 | 2.443503000  |
| H  | -2.405529000 | -1.426910000 | 2.104376000  |
| C  | -3.010413000 | -0.254056000 | 3.779096000  |
| H  | -2.296001000 | 0.560711000  | 3.618030000  |
| H  | -2.555346000 | -0.971816000 | 4.473157000  |
| H  | -3.908901000 | 0.155708000  | 4.261259000  |
| C  | -4.362277000 | -2.110466000 | 2.670925000  |
| H  | -5.315634000 | -1.719742000 | 3.053244000  |
| H  | -3.966602000 | -2.825561000 | 3.403376000  |
| H  | -4.572961000 | -2.659149000 | 1.742579000  |
| C  | 3.293324000  | -0.113266000 | 0.193840000  |
| C  | 3.727707000  | -0.096111000 | 1.549104000  |
| C  | 4.788346000  | 0.766510000  | 1.894603000  |
| H  | 5.131619000  | 0.791776000  | 2.924995000  |
| C  | 5.403652000  | 1.588298000  | 0.939652000  |
| H  | 6.218859000  | 2.247539000  | 1.227934000  |
| H  | 4.962085000  | 1.553866000  | -0.390197000 |
| H  | 5.441289000  | 2.192644000  | -1.127572000 |
| C  | 3.905566000  | 0.710700000  | -0.796666000 |
| C  | 3.133384000  | -1.019264000 | 2.614324000  |
| H  | 2.204225000  | -1.451343000 | 2.234897000  |
| C  | 2.767530000  | -0.269694000 | 3.918302000  |
| H  | 3.653781000  | 0.128306000  | 4.431958000  |
| H  | 2.263835000  | -0.960354000 | 4.606253000  |
| H  | 2.080969000  | 0.557758000  | 3.708100000  |
| H  | 4.099706000  | -2.198479000 | 2.915597000  |
| C  | 5.046754000  | -1.837836000 | 3.340884000  |
| H  | 4.336147000  | -2.773158000 | 2.009565000  |
| H  | 3.637920000  | -2.883211000 | 3.638267000  |
| C  | 3.491232000  | 0.728339000  | -2.275534000 |
| H  | 2.585664000  | 0.125489000  | -2.398267000 |
| C  | 4.599794000  | 0.119960000  | -3.179970000 |
| H  | 5.518258000  | 0.718783000  | -3.126431000 |
| H  | 4.269582000  | 0.106589000  | -4.227433000 |
| H  | 4.857203000  | -0.905122000 | -2.888526000 |
| C  | 3.154224000  | -2.160928000 | -2.765855000 |
| H  | 4.046963000  | 2.800499000  | -2.772140000 |

|    |              |              |              |
|----|--------------|--------------|--------------|
| H  | 2.397768000  | 2.633503000  | -2.133266000 |
| H  | 2.764358000  | 2.123848000  | -3.791638000 |
| N  | 2.174902000  | -0.973859000 | -0.184006000 |
| N  | -0.027994000 | -2.244274000 | -0.974909000 |
| N  | -2.224883000 | -0.900580000 | -0.294836000 |
| S  | -0.064254000 | 1.308461000  | 1.697024000  |
| C  | 0.086363000  | 2.906963000  | 0.805162000  |
| C  | -1.073694000 | 3.628469000  | 0.444921000  |
| H  | -2.052424000 | 3.202110000  | 0.646829000  |
| C  | -0.960955000 | 4.894519000  | -0.159640000 |
| H  | -1.861984000 | 5.441555000  | -0.430045000 |
| C  | 0.307505000  | 5.455766000  | -0.407825000 |
| H  | 0.392363000  | 6.436894000  | -0.869852000 |
| C  | 1.464640000  | 4.737610000  | -0.046658000 |
| H  | 2.449796000  | 5.162650000  | -0.228175000 |
| C  | 1.357888000  | 3.470469000  | 0.557258000  |
| H  | 2.251877000  | 2.924449000  | 0.845256000  |
| O  | 0.013708000  | 0.296663000  | -1.970958000 |
| O  | 0.097283000  | 1.581184000  | -2.166413000 |
| Cl | -0.101380000 | -2.445790000 | 2.001687000  |

### B<sub>Cl,5</sub>

|    |              |              |              |
|----|--------------|--------------|--------------|
| Fe | 0.352933000  | -0.300568000 | -0.317098000 |
| C  | 2.801541000  | 0.780970000  | 1.033850000  |
| C  | 2.530113000  | -0.542343000 | 1.662510000  |
| C  | 3.376077000  | -1.158918000 | 2.614177000  |
| H  | 4.295316000  | -0.678785000 | 2.927745000  |
| C  | 3.017743000  | -2.410161000 | 3.130531000  |
| H  | 3.647115000  | -2.895650000 | 3.871005000  |
| C  | 1.857793000  | -3.058753000 | 2.656243000  |
| H  | 1.601272000  | -4.051289000 | 3.007106000  |
| C  | 1.061337000  | -2.400846000 | 1.703298000  |
| C  | -0.079844000 | -3.041685000 | 0.987568000  |
| C  | 4.147220000  | 1.418289000  | 1.299768000  |
| H  | 4.249585000  | 2.364510000  | 0.766957000  |
| H  | 4.936150000  | 0.737245000  | 0.958409000  |
| H  | 4.301815000  | 1.603868000  | 2.370100000  |
| C  | -0.471073000 | -4.450667000 | 1.383535000  |
| H  | -0.755829000 | -4.491726000 | 2.442685000  |
| H  | 0.375634000  | -5.134631000 | 1.241072000  |
| H  | -1.306009000 | -4.811748000 | 0.782211000  |
| C  | 1.946846000  | 2.649913000  | -0.231628000 |
| C  | 1.671836000  | 3.747314000  | 0.640219000  |
| C  | 1.777435000  | 5.056142000  | 0.123723000  |
| H  | 1.574712000  | 5.900706000  | 0.777496000  |
| C  | 2.130335000  | 5.289169000  | -1.211953000 |
| C  | 2.209915000  | 6.306104000  | -1.588795000 |
| C  | 2.371742000  | 4.199397000  | -2.059839000 |
| H  | 2.634620000  | 4.378482000  | -3.098274000 |
| C  | 2.282861000  | 2.869061000  | -1.599524000 |
| C  | 1.252790000  | 3.584616000  | 2.108703000  |
| H  | 1.076210000  | 2.521616000  | 2.309190000  |
| C  | 2.355077000  | 4.081452000  | 3.084748000  |
| C  | 3.309760000  | 3.569255000  | 2.923615000  |
| H  | 2.046997000  | 3.915286000  | 4.126146000  |
| H  | 2.531353000  | 5.157389000  | 2.954519000  |
| C  | -0.071359000 | 4.335608000  | 2.408717000  |
| H  | 0.065625000  | 5.423245000  | 2.352202000  |
| H  | -0.421923000 | 4.097402000  | 3.421976000  |
| C  | -0.857455000 | 4.059020000  | 1.699252000  |
| C  | 2.611578000  | 1.724318000  | -2.561574000 |
| H  | 2.202696000  | 0.799197000  | -2.152688000 |
| C  | 1.976828000  | 1.909884000  | -3.960762000 |
| H  | 0.893224000  | 2.049000000  | -3.880990000 |
| H  | 2.156774000  | 1.009961000  | -4.563149000 |
| H  | 2.406453000  | 2.762001000  | -4.505506000 |
| C  | 4.148655000  | 1.535111000  | -2.679818000 |
| H  | 4.626093000  | 2.437188000  | -3.088478000 |
| H  | 4.372840000  | 0.691970000  | -3.345204000 |
| H  | 4.602594000  | 1.314335000  | -1.706480000 |
| C  | -1.640496000 | -2.934693000 | -0.843942000 |
| C  | -1.246267000 | -3.513209000 | -2.081880000 |
| C  | -2.244990000 | -4.090825000 | -2.892256000 |
| H  | -1.960470000 | -4.541519000 | -3.839810000 |
| C  | -3.592626000 | -4.088288000 | -2.504108000 |
| C  | -4.347358000 | -4.541835000 | -3.142115000 |
| C  | -3.962828000 | -3.481728000 | -1.295548000 |
| H  | -5.010942000 | -3.459635000 | -1.007374000 |
| C  | -3.004039000 | -2.888225000 | -0.447689000 |
| C  | 0.210102000  | -3.534341000 | -2.554950000 |
| H  | 0.823163000  | -2.965327000 | -1.851773000 |
| C  | 0.367464000  | -2.836796000 | -3.930373000 |
| H  | -0.166443000 | -3.376813000 | -4.724526000 |
| H  | 1.429433000  | -2.792668000 | -4.204101000 |
| H  | -0.017893000 | -1.812053000 | -3.887543000 |
| C  | 0.768860000  | -4.981720000 | -2.599304000 |
| H  | 0.224475000  | -5.598390000 | -3.327420000 |
| H  | 0.691131000  | -5.475366000 | -1.620411000 |
| H  | 1.827146000  | -4.968038000 | -2.891026000 |
| C  | -3.478829000 | -2.199892000 | 0.836656000  |

|    |              |              |              |
|----|--------------|--------------|--------------|
| H  | -2.619239000 | -1.704296000 | 1.304413000  |
| C  | -4.056531000 | -3.211686000 | 1.862612000  |
| H  | -4.934863000 | -3.727858000 | 1.453032000  |
| H  | -4.368722000 | -2.690863000 | 2.777816000  |
| H  | -3.320919000 | -3.977003000 | 2.139846000  |
| C  | -4.522990000 | -1.098057000 | 0.520438000  |
| H  | -5.447580000 | -1.528864000 | 0.114497000  |
| H  | -4.130041000 | -0.387488000 | -0.214467000 |
| H  | -4.783894000 | -0.545250000 | 1.432593000  |
| N  | -0.603266000 | -2.358345000 | 0.003711000  |
| N  | 1.370741000  | -1.142980000 | 1.292143000  |
| N  | 1.847278000  | 1.292617000  | 0.292140000  |
| O  | 2.144472000  | -1.214123000 | -1.263931000 |
| O  | 3.391194000  | -1.156512000 | -0.732464000 |
| S  | -1.304550000 | 0.666446000  | 1.952439000  |
| C  | -2.623859000 | 1.836732000  | 1.668132000  |
| C  | -3.409734000 | 2.290264000  | 2.769267000  |
| H  | -3.192092000 | 1.912059000  | 3.764371000  |
| H  | -5.039788000 | 3.556017000  | 3.405683000  |
| C  | -4.443236000 | 3.212768000  | 2.564286000  |
| C  | -4.707466000 | 3.699830000  | 1.262599000  |
| H  | -5.509018000 | 4.418100000  | 1.105891000  |
| H  | -4.140376000 | 3.627105000  | -0.832664000 |
| C  | -3.934792000 | 3.255120000  | 0.167420000  |
| C  | -2.899988000 | 2.327643000  | 0.358762000  |
| H  | -2.310435000 | 1.970336000  | -0.481941000 |
| Cl | -1.000152000 | 0.462867000  | -2.057062000 |

### B<sub>Cl,7</sub>

|    |              |              |              |
|----|--------------|--------------|--------------|
| Fe | 0.030196000  | -0.039303000 | 0.080241000  |
| C  | 2.713549000  | 0.870195000  | 1.192176000  |
| C  | 2.441636000  | -0.470809000 | 1.770767000  |
| C  | 3.214488000  | -1.087435000 | 2.773936000  |
| H  | 4.064569000  | -0.574931000 | 3.209426000  |
| C  | 2.866610000  | -2.380971000 | 3.201525000  |
| H  | 3.442231000  | -2.871928000 | 3.980455000  |
| C  | 1.777017000  | -3.041512000 | 2.604326000  |
| H  | 1.508620000  | -4.046124000 | 2.910592000  |
| C  | 1.040753000  | -2.375558000 | 1.606137000  |
| C  | -0.086538000 | -2.968164000 | 0.842515000  |
| C  | 3.957690000  | 1.606846000  | 1.633706000  |
| H  | 4.113555000  | 2.508086000  | 1.039398000  |
| H  | 4.838867000  | 0.961701000  | 1.531973000  |
| H  | 3.878985000  | 1.900230000  | 2.688499000  |
| C  | -0.440918000 | -4.418062000 | 1.087686000  |
| H  | -0.821501000 | -4.550796000 | 2.108870000  |
| H  | 0.445158000  | -5.055714000 | 0.977882000  |
| H  | -1.205572000 | -4.760968000 | 0.389819000  |
| C  | 2.000059000  | 2.581040000  | -0.357973000 |
| C  | 1.675340000  | 3.788517000  | 0.321333000  |
| C  | 1.838228000  | 5.001627000  | -0.382371000 |
| H  | 1.590270000  | 5.936385000  | 0.113889000  |
| C  | 2.299123000  | 5.025539000  | -1.704942000 |
| H  | 2.416068000  | 5.972933000  | -2.225610000 |
| C  | 2.597004000  | 3.820491000  | -2.359655000 |
| H  | 2.941074000  | 3.844481000  | -3.389579000 |
| C  | 2.448255000  | 2.580150000  | -1.709581000 |
| C  | 1.127619000  | 3.841444000  | 1.753589000  |
| H  | 0.991044000  | 2.820440000  | 2.125600000  |
| C  | 2.091541000  | 4.590575000  | 2.713321000  |
| H  | 3.094522000  | 4.146632000  | 2.726332000  |
| H  | 1.694725000  | 4.569880000  | 3.737025000  |
| H  | 2.200560000  | 5.642995000  | 2.419681000  |
| C  | -0.270651000 | 4.512434000  | 1.787100000  |
| H  | -0.210980000 | 5.574874000  | 1.514308000  |
| H  | -0.698336000 | 4.443638000  | 2.795248000  |
| H  | -0.963477000 | 4.019639000  | 1.099210000  |
| C  | 2.828873000  | 1.284521000  | -2.432924000 |
| H  | 2.320161000  | 0.455471000  | -1.928063000 |
| C  | 2.368779000  | 1.259393000  | -3.909460000 |
| H  | 1.295942000  | 1.464892000  | -3.982755000 |
| H  | 2.556509000  | 0.266591000  | -4.339482000 |
| H  | 2.913306000  | 1.989654000  | -4.522617000 |
| C  | 4.361050000  | 1.040245000  | -2.337626000 |
| H  | 4.912739000  | 1.859307000  | -2.818156000 |
| H  | 4.633799000  | 0.104537000  | -2.843348000 |
| H  | 4.699931000  | 0.973849000  | -1.295385000 |
| C  | -1.711646000 | -2.665193000 | -0.912986000 |
| C  | -1.336107000 | -3.048974000 | -2.230460000 |
| C  | -2.337530000 | -3.553052000 | -3.083658000 |
| H  | -2.073599000 | -3.857778000 | -4.092808000 |
| C  | -3.670318000 | -3.658415000 | -2.657306000 |
| H  | -4.429481000 | -4.049489000 | -3.330446000 |
| C  | -4.021783000 | -3.241613000 | -1.366217000 |
| H  | -5.059725000 | -3.302681000 | -1.049248000 |
| C  | -3.058942000 | -2.732622000 | -0.467994000 |
| C  | 0.112863000  | -2.962418000 | -2.721958000 |
| H  | 0.670141000  | -2.324788000 | -2.027886000 |
| C  | 0.220829000  | -2.305862000 | -4.119790000 |
| H  | -0.244798000 | -2.923137000 | -4.899295000 |
| H  | 1.277493000  | -2.175964000 | -4.391008000 |

|    |              |              |              |
|----|--------------|--------------|--------------|
| H  | -0.258634000 | -1.321415000 | -4.118538000 |
| C  | 0.785366000  | -4.362937000 | -2.721062000 |
| H  | 0.268923000  | -5.044137000 | -3.410639000 |
| H  | 0.767431000  | -4.821785000 | -1.723381000 |
| H  | 1.833116000  | -4.284727000 | -3.040428000 |
| C  | -3.511835000 | -2.259350000 | 0.918429000  |
| H  | -2.666942000 | -1.780758000 | 1.425554000  |
| C  | -4.002970000 | -3.440231000 | 1.798713000  |
| H  | -4.883707000 | -3.923573000 | 1.354910000  |
| H  | -4.286449000 | -3.074280000 | 2.794260000  |
| H  | -3.231092000 | -4.209690000 | 1.925397000  |
| C  | -4.626243000 | -1.186412000 | 0.804122000  |
| C  | -5.551224000 | -1.608902000 | 0.388637000  |
| H  | -4.310762000 | -0.355497000 | 0.165583000  |
| H  | -4.856514000 | -0.776049000 | 1.795065000  |
| N  | -0.661477000 | -2.176901000 | -0.027696000 |
| N  | 1.367667000  | -1.108220000 | 1.235771000  |
| N  | 1.848879000  | 1.294003000  | 0.304718000  |
| O  | 3.162639000  | -2.142356000 | -1.240271000 |
| O  | 4.125474000  | -1.901156000 | -0.442027000 |
| S  | -1.027544000 | 0.513805000  | 2.206295000  |
| C  | -2.511642000 | 1.588415000  | 2.039391000  |
| C  | -3.235103000 | 1.893055000  | 3.217144000  |
| H  | -2.897895000 | 1.489409000  | 4.168813000  |
| H  | -4.923703000 | 2.932180000  | 4.078877000  |
| C  | -4.380150000 | 2.709579000  | 3.162482000  |
| C  | -4.821290000 | 3.235984000  | 1.931763000  |
| H  | -5.706422000 | 3.866674000  | 1.888119000  |
| H  | -4.428618000 | 3.331930000  | -0.199897000 |
| C  | -4.101397000 | 2.934544000  | 0.758821000  |
| C  | -2.955433000 | 2.118188000  | 0.806961000  |
| H  | -2.416575000 | 1.895600000  | -0.109614000 |
| Cl | -0.832997000 | 0.714486000  | -1.944668000 |

### AOTF, 5

|    |              |              |              |
|----|--------------|--------------|--------------|
| Fe | -0.037877000 | 0.030847000  | 0.090797000  |
| C  | 2.531969000  | -0.197423000 | 1.771851000  |
| C  | 1.533839000  | -1.140279000 | 2.373248000  |
| C  | 1.823428000  | -2.013735000 | 3.437983000  |
| H  | 2.815897000  | -2.052660000 | 3.870425000  |
| C  | 0.800561000  | -2.848011000 | 3.924170000  |
| H  | 1.001252000  | -3.535709000 | 4.740410000  |
| C  | -0.473618000 | -2.801272000 | 3.340688000  |
| H  | -1.260788000 | -3.457535000 | 3.689729000  |
| C  | -0.700187000 | -1.908896000 | 2.272040000  |
| C  | -2.013937000 | -1.771715000 | 1.570313000  |
| C  | 3.927536000  | -0.172960000 | 2.353328000  |
| H  | 4.553271000  | 0.556914000  | 1.838302000  |
| H  | 4.389614000  | -1.163296000 | 2.249305000  |
| H  | 3.906296000  | 0.075162000  | 3.421699000  |
| C  | -3.120709000 | -2.718919000 | 1.970232000  |
| H  | -3.337777000 | -2.660440000 | 3.043200000  |
| H  | -2.795764000 | -3.743172000 | 1.745356000  |
| H  | -4.037833000 | -2.515002000 | 1.416997000  |
| C  | 2.926625000  | 1.582177000  | 0.178647000  |
| C  | 2.980530000  | 2.861985000  | 0.805230000  |
| C  | 3.734141000  | 3.873080000  | 0.171455000  |
| H  | 3.788620000  | 4.856640000  | 0.630752000  |
| C  | 4.407450000  | 3.638762000  | -1.035749000 |
| H  | 4.980482000  | 4.434500000  | -1.505553000 |
| C  | 4.340433000  | 2.371031000  | -1.631194000 |
| H  | 4.865833000  | 2.188549000  | -2.564504000 |
| C  | 3.604782000  | 1.321272000  | -1.044128000 |
| C  | 2.277796000  | 3.195390000  | 2.129140000  |
| H  | 1.625206000  | 2.361095000  | 2.403761000  |
| C  | 3.308729000  | 3.408529000  | 3.272351000  |
| H  | 3.955548000  | 2.533929000  | 3.413753000  |
| H  | 2.790150000  | 3.608520000  | 4.219734000  |
| C  | 3.957899000  | 4.267533000  | 3.057849000  |
| C  | 1.368527000  | 4.445729000  | 2.003750000  |
| H  | 1.957058000  | 5.353593000  | 1.815317000  |
| H  | 0.812232000  | 4.598193000  | 2.938184000  |
| H  | 0.640845000  | 4.330237000  | 1.195211000  |
| C  | 3.621331000  | -0.063398000 | -1.697680000 |
| H  | 2.851337000  | -0.680463000 | -1.226765000 |
| C  | 3.283558000  | -0.014097000 | -3.208191000 |
| H  | 2.315434000  | 0.470442000  | -3.372906000 |
| H  | 3.224270000  | -1.034753000 | -3.606905000 |
| H  | 4.048972000  | 0.524135000  | -3.783877000 |
| C  | 5.001445000  | -0.742657000 | -1.471750000 |
| H  | 5.806777000  | -0.153036000 | -1.930364000 |
| H  | 5.011264000  | -1.741459000 | -1.923729000 |
| H  | 5.232398000  | -0.850641000 | -0.403439000 |
| C  | -3.367262000 | -0.518331000 | 0.012369000  |
| C  | -3.662463000 | -1.015608000 | -1.288599000 |
| C  | -4.887706000 | -0.646394000 | -1.880445000 |
| H  | -5.126779000 | -1.021142000 | -2.871180000 |
| C  | -5.797193000 | 0.189016000  | -1.216213000 |
| H  | -6.738294000 | 0.459420000  | -1.688868000 |
| C  | -5.484447000 | 0.675444000  | 0.060781000  |
| H  | -6.187985000 | 1.329529000  | 0.568691000  |
| C  | -4.272121000 | 0.343050000  | 0.703047000  |

|   |              |              |              |
|---|--------------|--------------|--------------|
| C | -2.732593000 | -1.983812000 | -2.021951000 |
| H | -1.738867000 | -1.890788000 | -1.575882000 |
| C | -2.571463000 | -1.665200000 | -3.526954000 |
| H | -3.501462000 | -1.838667000 | -4.085507000 |
| H | -1.799985000 | -2.320368000 | -3.948209000 |
| H | -2.257297000 | -0.626781000 | -3.678611000 |
| C | -3.211204000 | -3.450933000 | -1.837253000 |
| H | -4.206367000 | -3.589871000 | -2.281945000 |
| H | -3.267805000 | -3.734299000 | -0.779514000 |
| H | -2.508232000 | -4.132604000 | -2.328724000 |
| C | -4.007289000 | 0.922576000  | 2.101721000  |
| H | -2.957389000 | 0.749058000  | 2.361686000  |
| C | -4.895702000 | 0.235294000  | 3.176687000  |
| H | -5.959103000 | 0.416480000  | 2.972204000  |
| H | -4.671040000 | 0.642621000  | 4.171752000  |
| H | -4.747026000 | -0.849469000 | 3.209541000  |
| C | -4.239088000 | 2.455672000  | 2.153293000  |
| H | -5.301553000 | 2.706062000  | 2.033837000  |
| H | -3.668617000 | 2.967875000  | 1.374233000  |
| H | -3.914462000 | 2.848631000  | 3.125947000  |
| N | -2.092807000 | -0.858069000 | 0.641233000  |
| N | 0.291435000  | -1.102127000 | 1.834380000  |
| N | 2.114267000  | 0.531952000  | 0.778894000  |
| N | 2.477720000  | -3.844113000 | -0.741011000 |
| F | 2.515787000  | -5.184542000 | -0.405488000 |
| F | 3.236394000  | -3.645700000 | -1.878947000 |
| F | 3.051784000  | -3.119022000 | 0.307046000  |
| S | 0.567384000  | -3.255112000 | -1.027535000 |
| O | 0.757046000  | -1.598776000 | -0.971036000 |
| O | 0.182023000  | -3.827772000 | -2.488251000 |
| O | -0.206260000 | -3.868662000 | 0.268097000  |
| S | -0.316200000 | 1.084875000  | -2.026407000 |
| C | -0.967497000 | 2.769013000  | -1.876314000 |
| C | -0.085938000 | 3.879784000  | -1.917455000 |
| H | 0.984785000  | 3.706127000  | -1.980369000 |
| C | -0.595660000 | 5.186497000  | -1.879178000 |
| H | 0.087163000  | 6.032509000  | -1.912129000 |
| C | -1.989310000 | 5.405395000  | -1.800530000 |
| H | -2.380272000 | 6.420221000  | -1.775211000 |
| C | -2.869410000 | 4.307119000  | -1.755682000 |
| H | -3.942932000 | 4.468891000  | -1.693289000 |
| C | -2.364741000 | 2.994834000  | -1.787955000 |
| H | -0.309535000 | 2.144701000  | -1.754620000 |
| O | -0.456184000 | 1.713752000  | 1.171430000  |
| O | -1.346731000 | 2.673948000  | 0.981905000  |

### AOTF, 7

|    |              |              |              |
|----|--------------|--------------|--------------|
| Fe | 0.001393000  | -0.029616000 | -0.020778000 |
| C  | 2.528558000  | 0.109522000  | 1.708257000  |
| C  | 1.615716000  | -0.877610000 | 2.365288000  |
| H  | 1.960917000  | -1.646557000 | 3.492633000  |
| C  | 2.942361000  | -1.564390000 | 3.944216000  |
| C  | 1.007547000  | -2.537776000 | 4.017927000  |
| H  | 1.251662000  | -3.147118000 | 4.883099000  |
| C  | -0.252400000 | -2.650500000 | 3.411174000  |
| H  | -0.983819000 | -3.352856000 | 3.791078000  |
| C  | -0.535289000 | -1.855624000 | 2.281468000  |
| C  | -1.836813000 | -1.878732000 | 1.548196000  |
| C  | 3.925829000  | 0.262427000  | 2.264443000  |
| H  | 4.497172000  | 0.999377000  | 1.699113000  |
| H  | 4.448836000  | -0.701119000 | 2.211119000  |
| H  | 3.900939000  | 0.571015000  | 3.316748000  |
| C  | -2.850580000 | -2.920646000 | 1.955589000  |
| H  | -3.117899000 | -2.837865000 | 3.015621000  |
| H  | -2.404726000 | -3.910568000 | 1.792548000  |
| H  | -3.760166000 | -2.844390000 | 1.359421000  |
| C  | 2.789850000  | 1.830207000  | 0.031832000  |
| C  | 2.783558000  | 3.133197000  | 0.609759000  |
| C  | 3.480426000  | 4.157234000  | -0.066350000 |
| H  | 3.487448000  | 5.158890000  | 0.355513000  |
| C  | 4.156742000  | 3.912547000  | -1.269546000 |
| H  | 4.685202000  | 4.718241000  | -1.773269000 |
| C  | 4.147928000  | 2.622575000  | -1.818225000 |
| H  | 4.673385000  | 2.432873000  | -2.750097000 |
| C  | 3.469686000  | 1.559763000  | -1.187374000 |
| C  | 2.067444000  | 3.483561000  | 1.922002000  |
| H  | 1.468652000  | 2.623817000  | 2.240216000  |
| C  | 3.083478000  | 3.805523000  | 3.052996000  |
| H  | 3.778963000  | 2.976855000  | 3.232280000  |
| H  | 2.553862000  | 4.017688000  | 3.991547000  |
| H  | 3.682465000  | 4.689699000  | 2.799113000  |
| C  | 1.089255000  | 4.674448000  | 1.745699000  |
| H  | 1.627865000  | 5.605032000  | 1.523423000  |
| H  | 0.519999000  | 4.833225000  | 2.671083000  |
| H  | 0.376450000  | 4.492176000  | 0.935776000  |
| C  | 3.545891000  | 0.158771000  | -1.799490000 |
| H  | 2.831319000  | -0.490780000 | -1.286505000 |
| C  | 3.157330000  | 0.147111000  | -3.299135000 |
| H  | 2.167621000  | 0.591678000  | -3.448324000 |
| C  | 3.125854000  | -0.886879000 | -3.665023000 |
| H  | 3.883219000  | 0.696589000  | -3.914050000 |
| C  | 4.968552000  | -0.434828000 | -1.600233000 |

|   |              |              |              |
|---|--------------|--------------|--------------|
| H | 5.724791000  | 0.186656000  | -2.098411000 |
| H | 5.022004000  | -1.443407000 | -2.026344000 |
| H | 5.236182000  | -0.500129000 | -0.536793000 |
| C | -3.274755000 | -0.820188000 | -0.074867000 |
| C | -3.478804000 | -1.332965000 | -1.387323000 |
| C | -4.719820000 | -1.092854000 | -2.011255000 |
| H | -4.888634000 | -1.477349000 | -3.012693000 |
| C | -5.735477000 | -0.373701000 | -1.365892000 |
| H | -6.685626000 | -0.200208000 | -1.865005000 |
| C | -5.518221000 | 0.119985000  | -0.072547000 |
| H | -6.308133000 | 0.677791000  | 0.423518000  |
| C | -4.294790000 | -0.084400000 | 0.601849000  |
| C | -2.438521000 | -2.200452000 | -2.096722000 |
| H | -1.472789000 | -2.034273000 | -1.613046000 |
| C | -2.248018000 | -1.839146000 | -3.588733000 |
| H | -3.141468000 | -2.068424000 | -4.185284000 |
| H | -1.416177000 | -2.426543000 | -3.995451000 |
| H | -2.007856000 | -0.776788000 | -3.707594000 |
| C | -2.797930000 | -3.705742000 | -1.946522000 |
| H | -3.754945000 | -3.925043000 | -2.439570000 |
| H | -2.882403000 | -4.002498000 | -0.893413000 |
| H | -2.015118000 | -4.320142000 | -2.404812000 |
| C | -4.149636000 | 0.497991000  | 2.016656000  |
| H | -3.112358000 | 0.378260000  | 2.348163000  |
| C | -5.066645000 | -0.242493000 | 3.030503000  |
| H | -6.123795000 | -0.108268000 | 2.767324000  |
| H | -4.919617000 | 0.161850000  | 4.041158000  |
| H | -4.869319000 | -1.319732000 | 3.059322000  |
| C | -4.468941000 | 2.016420000  | 2.054263000  |
| H | -5.529837000 | 2.204979000  | 1.844761000  |
| H | -3.871633000 | 2.570820000  | 1.325046000  |
| H | -4.251659000 | 2.420460000  | 3.051995000  |
| N | -1.981833000 | -1.011802000 | 0.579437000  |
| N | 0.388925000  | -0.992765000 | 1.805743000  |
| N | 2.045039000  | 0.757709000  | 0.684927000  |
| C | 2.834836000  | -3.726803000 | -0.506682000 |
| F | 3.000463000  | -5.022247000 | -0.053350000 |
| F | 3.599336000  | -3.547511000 | -1.643544000 |
| F | 3.303928000  | -2.858434000 | 0.483998000  |
| S | 0.880433000  | -3.360684000 | -0.881908000 |
| O | 0.885628000  | -1.691257000 | -0.941267000 |
| O | 0.596841000  | -4.068509000 | -2.305852000 |
| O | 0.126551000  | -3.952161000 | 0.435370000  |
| S | -0.398656000 | 1.226672000  | -1.978856000 |
| C | -1.304688000 | 2.798744000  | -1.740061000 |
| C | -0.612962000 | 4.025916000  | -1.873172000 |
| C | 0.457311000  | 4.016263000  | -2.059961000 |
| C | -1.307763000 | 5.244744000  | -1.774998000 |
| H | -0.764570000 | 6.181765000  | -1.878936000 |
| C | -2.700407000 | 5.255895000  | -1.552411000 |
| H | -3.236705000 | 6.199724000  | -1.484158000 |
| C | -3.391703000 | 4.035434000  | -1.426802000 |
| H | -4.467447000 | 4.031340000  | -1.264180000 |
| C | -2.700954000 | 2.812296000  | -1.518867000 |
| H | -3.239635000 | 1.873473000  | -1.436841000 |
| O | -0.761494000 | 1.628133000  | 1.680873000  |
| O | -1.438885000 | 2.691815000  | 1.387671000  |

## BoTF, 5

|    |              |              |              |
|----|--------------|--------------|--------------|
| Fe | -0.758290000 | 0.082845000  | 0.829155000  |
| C  | 0.222041000  | 2.480246000  | 2.022313000  |
| C  | 0.570988000  | 1.377562000  | 2.928333000  |
| C  | 1.136821000  | 1.465831000  | 4.207884000  |
| H  | 1.401904000  | 2.429021000  | 4.629463000  |
| C  | 1.346909000  | 0.277052000  | 4.940640000  |
| H  | 1.783049000  | 0.322615000  | 5.933802000  |
| C  | 0.982908000  | -0.962666000 | 4.388760000  |
| H  | 1.122459000  | -1.878686000 | 4.951905000  |
| C  | 0.421209000  | -0.999490000 | 3.098356000  |
| C  | 0.024292000  | -2.180145000 | 2.321298000  |
| C  | 0.498160000  | 3.902807000  | 2.439021000  |
| H  | 0.304525000  | 4.604592000  | 1.627304000  |
| H  | 1.541255000  | 4.010831000  | 2.760007000  |
| H  | -0.138906000 | 4.175890000  | 3.290275000  |
| C  | 0.161765000  | -3.558843000 | 2.911821000  |
| H  | -0.627078000 | -3.724947000 | 3.657207000  |
| H  | 1.128473000  | -3.672096000 | 3.416727000  |
| H  | 0.072988000  | -4.329735000 | 2.144422000  |
| C  | -0.762233000 | 3.101440000  | -0.088611000 |
| C  | -2.018375000 | 3.746377000  | 0.073832000  |
| C  | -2.374374000 | 4.721969000  | -0.879819000 |
| H  | -3.335654000 | 5.221063000  | -0.791518000 |
| C  | -1.526372000 | 5.039420000  | -1.949417000 |
| C  | -1.828168000 | 5.787493000  | -2.678437000 |
| C  | -0.298136000 | 4.375670000  | -2.094925000 |
| H  | 0.339216000  | 4.610986000  | -2.941623000 |
| C  | 0.111196000  | 3.392036000  | -1.173486000 |
| C  | -2.991810000 | 3.420309000  | 1.215302000  |
| H  | -2.593873000 | 2.585820000  | 1.802861000  |
| C  | -3.174194000 | 4.634093000  | 2.167573000  |
| H  | -2.220376000 | 4.985147000  | 2.581747000  |

|   |              |              |              |
|---|--------------|--------------|--------------|
| H | -3.830816000 | 4.360675000  | 3.004120000  |
| H | -3.636738000 | 4.479519000  | 1.641264000  |
| C | -4.372770000 | 2.958669000  | 0.678507000  |
| H | -4.893696000 | 3.776607000  | 0.162162000  |
| H | -5.002624000 | 2.628831000  | 1.514846000  |
| H | -4.263115000 | 2.133296000  | -0.029854000 |
| C | 1.477276000  | -3.707633000 | -1.316029000 |
| H | 1.421671000  | 1.737360000  | -0.804033000 |
| C | 1.870816000  | 2.428699000  | -2.786131000 |
| H | 1.072021000  | 1.889370000  | -3.302878000 |
| H | 2.783236000  | 1.815723000  | -2.812841000 |
| H | 2.088849000  | 3.356064000  | -3.332834000 |
| C | 2.590695000  | 3.542929000  | -0.622596000 |
| H | 2.685514000  | 4.526803000  | -1.101628000 |
| H | 3.557650000  | 3.029026000  | -0.698886000 |
| H | 2.386075000  | 3.704558000  | 0.441702000  |
| C | -0.726509000 | -2.950025000 | 0.143587000  |
| C | 0.186177000  | -3.171871000 | -0.925089000 |
| C | -0.108842000 | -4.193973000 | -1.846982000 |
| H | 0.574949000  | -4.386249000 | -2.668583000 |
| C | -1.284897000 | -4.952232000 | -1.733812000 |
| H | -1.503289000 | -5.729829000 | -2.461838000 |
| C | 2.186848000  | -4.692400000 | -0.692489000 |
| H | -3.106561000 | -5.267432000 | -0.625388000 |
| C | -1.931096000 | -3.693262000 | 0.270667000  |
| C | 1.483801000  | -2.366521000 | -1.047202000 |
| H | 1.363847000  | -1.446055000 | -0.463095000 |
| C | 1.799047000  | -1.941599000 | -2.501123000 |
| C | 2.002172000  | -2.805580000 | -3.147598000 |
| H | 2.695924000  | -1.306927000 | -2.515432000 |
| H | 0.970937000  | -1.371604000 | -2.936668000 |
| C | 2.674269000  | -3.152253000 | -0.430753000 |
| H | 2.853088000  | -4.085059000 | -0.982378000 |
| H | 2.482969000  | -3.415454000 | -0.184110000 |
| H | 3.592611000  | -2.551496000 | -0.468303000 |
| C | -2.972465000 | -3.415988000 | 1.360915000  |
| H | -2.551964000 | -2.726597000 | 2.098228000  |
| C | -3.395756000 | -4.703151000 | 2.114939000  |
| H | -3.924562000 | -5.405498000 | 1.457489000  |
| H | -4.076957000 | -4.444516000 | 2.935964000  |
| H | -2.532168000 | -5.232157000 | 2.540453000  |
| C | -4.214477000 | -2.703518000 | 0.761586000  |
| H | -4.705457000 | -3.329613000 | 0.004542000  |
| H | -3.932977000 | -1.756575000 | 0.291223000  |
| H | -4.939801000 | -2.486988000 | 1.556585000  |
| N | -0.386875000 | -1.906356000 | 1.093812000  |
| N | 0.248965000  | 0.161539000  | 2.399598000  |
| N | -0.339644000 | 2.100053000  | 0.887291000  |
| O | -2.393444000 | 0.122764000  | 2.245133000  |
| O | -2.373870000 | -0.766659000 | 3.270686000  |
| C | 7.769260000  | -0.609285000 | -2.234511000 |
| H | 8.421912000  | -0.847685000 | -3.070908000 |
| C | 6.479974000  | -0.083952000 | -2.474357000 |
| H | 6.140304000  | 0.081648000  | -3.493277000 |
| C | 5.635325000  | 0.224851000  | -1.398572000 |
| H | 4.644147000  | 0.632352000  | -1.575831000 |
| C | 6.068561000  | 0.011153000  | -0.057000000 |
| S | 4.999051000  | 0.400118000  | 1.322470000  |
| C | 7.372578000  | -0.519562000 | 0.170040000  |
| H | 7.702571000  | -0.682122000 | 1.192177000  |
| C | 8.212310000  | -0.825450000 | -0.910355000 |
| H | 9.204771000  | -1.229200000 | -0.727881000 |
| O | -1.535199000 | -0.340794000 | -0.885950000 |
| S | -2.071137000 | 0.468383000  | -2.265376000 |
| O | -3.287421000 | 1.503661000  | -2.019432000 |
| O | -0.853255000 | 0.879092000  | -3.251545000 |
| C | -2.910056000 | -1.106183000 | -3.174880000 |
| F | -3.522647000 | -0.669550000 | -4.338919000 |
| F | -1.948382000 | -2.041814000 | -3.504548000 |
| F | -3.864528000 | -1.694479000 | -2.366997000 |

## BoTF, 7

|    |              |              |             |
|----|--------------|--------------|-------------|
| Fe | -0.682658000 | 0.147738000  | 0.716844000 |
| C  | 0.891766000  | 2.468030000  | 1.843460000 |
| C  | 1.231440000  | 1.290344000  | 2.689056000 |
| C  | 1.960196000  | 1.334222000  | 3.891768000 |
| H  | 2.384609000  | 2.263449000  | 4.253765000 |
| C  | 2.116831000  | 0.141450000  | 4.625674000 |
| H  | 2.672234000  | 0.148700000  | 5.558965000 |
| C  | 1.542065000  | -1.052438000 | 4.160004000 |
| H  | 1.632230000  | -1.967147000 | 4.734449000 |
| C  | 0.833799000  | -1.031609000 | 2.940790000 |
| C  | 0.198440000  | -2.210590000 | 2.285986000 |
| C  | 1.500464000  | 3.807282000  | 2.188877000 |
| H  | 1.153842000  | 4.587178000  | 1.509862000 |
| H  | 2.595313000  | 3.752098000  | 2.134649000 |
| C  | 1.234098000  | 4.096381000  | 3.213457000 |
| H  | 0.288247000  | -3.556081000 | 2.962071000 |
| H  | -0.306643000 | -3.549612000 | 3.884750000 |
| H  | 1.325486000  | -3.788457000 | 3.233919000 |
| H  | -0.090481000 | -4.348367000 | 2.314372000 |

|         |              |              |              |   |               |              |              |
|---------|--------------|--------------|--------------|---|---------------|--------------|--------------|
| C       | -0.380752000 | 3.309357000  | -0.027611000 | N | -0.388437000  | -2.424202000 | -0.436402000 |
| C       | -1.620526000 | 3.950079000  | 0.247009000  | C | -2.066483000  | 2.113539000  | -0.589625000 |
| C       | -2.030551000 | 4.978962000  | -0.624639000 | C | -2.793956000  | 0.819808000  | -0.419392000 |
| H       | -2.976839000 | 5.480646000  | -0.444153000 | C | -4.199323000  | 0.729538000  | -0.406435000 |
| C       | -1.253268000 | 5.348442000  | -1.732561000 | C | -4.800029000  | -0.530586000 | -0.263861000 |
| H       | -1.594625000 | 6.137639000  | -2.397745000 | C | -3.991543000  | -1.673657000 | -0.179273000 |
| C       | -0.049051000 | 4.680632000  | -1.996284000 | C | -2.589684000  | -1.527297000 | -0.215896000 |
| C       | 0.531741000  | 4.953232000  | -2.873751000 | C | -1.656384000  | -2.692511000 | -0.299572000 |
| H       | 0.412839000  | 3.646410000  | -1.156871000 | C | -2.888101000  | 3.363801000  | -0.825218000 |
| C       | -2.483351000 | 3.576585000  | 1.459054000  | C | -2.261412000  | -4.081590000 | -0.295459000 |
| H       | -2.164282000 | 2.597039000  | 1.832806000  | C | 0.046616000   | 3.276032000  | -0.674257000 |
| C       | -2.288486000 | 4.600985000  | 2.612036000  | C | 0.528201000   | 3.658899000  | -1.957809000 |
| H       | -1.237816000 | 4.678284000  | 2.921680000  | C | 1.344473000   | 4.806591000  | -2.044890000 |
| H       | -2.879652000 | 4.300404000  | 3.486946000  | C | 1.666338000   | 5.565411000  | -0.911241000 |
| H       | -2.620329000 | 5.601699000  | 2.303302000  | C | 1.163881000   | 5.182303000  | 0.339631000  |
| C       | -3.985985000 | 3.448726000  | 1.105119000  | C | 0.350867000   | 4.039669000  | 0.489389000  |
| H       | -4.429124000 | 4.421405000  | 0.850394000  | C | 0.169611000   | 2.914795000  | -3.247661000 |
| H       | -4.533028000 | 3.051771000  | 1.970182000  | C | 1.431196000   | 2.376604000  | -3.969393000 |
| C       | -4.131533000 | 2.769361000  | 0.259211000  | C | -0.663413000  | 3.816991000  | -4.198684000 |
| C       | 1.726794000  | 2.930747000  | -1.495959000 | C | -0.191363000  | 3.701946000  | 1.882634000  |
| H       | 1.873462000  | 2.108604000  | -0.784757000 | C | -1.273288000  | 4.727312000  | 2.322423000  |
| C       | 1.684911000  | 2.306479000  | -2.915672000 | C | 0.929552000   | 3.621433000  | 2.947989000  |
| H       | 0.821688000  | 1.645188000  | -3.037835000 | C | 0.572852000   | -3.463771000 | -0.791263000 |
| H       | 2.608338000  | 1.738755000  | -3.101773000 | C | 0.629468000   | -3.916773000 | -2.144112000 |
| H       | 1.614372000  | 3.081742000  | -3.689581000 | C | 1.594989000   | -4.892206000 | -2.473327000 |
| C       | 2.943443000  | 3.886986000  | -1.364121000 | C | 2.470957000   | -5.415872000 | -1.514557000 |
| H       | 2.868777000  | 4.714415000  | -2.081606000 | C | 2.393591000   | -4.961497000 | -0.190915000 |
| H       | 3.878609000  | 3.348161000  | -1.567260000 | C | 1.456404000   | -3.982616000 | 0.195907000  |
| H       | 3.014700000  | 4.322052000  | -0.359488000 | C | -0.276047000  | -3.401601000 | -3.271763000 |
| C       | -0.934838000 | -3.015046000 | 0.289028000  | C | 0.557492000   | -2.712818000 | -4.384370000 |
| C       | -0.229168000 | -3.342241000 | -0.904185000 | C | -1.141150000  | -4.542452000 | -3.873369000 |
| C       | -0.772402000 | -4.330621000 | -1.746002000 | C | 1.374543000   | -3.566110000 | 1.664880000  |
| C       | -0.253919000 | -4.600446000 | -2.661149000 | C | 2.767332000   | -3.355961000 | 2.306423000  |
| H       | -1.986835000 | -4.961775000 | -1.430507000 | C | 0.569011000   | -4.614925000 | 2.482380000  |
| H       | -2.396047000 | -5.717717000 | -2.096341000 | C | -1.509576000  | -0.402753000 | 2.855516000  |
| C       | -2.681551000 | -4.599002000 | -0.268954000 | C | -2.431620000  | 0.625668000  | 3.164818000  |
| H       | -3.635131000 | -5.071108000 | -0.047981000 | C | -3.644952000  | 0.334312000  | 3.816183000  |
| C       | -2.178919000 | -3.620370000 | 0.615718000  | C | -3.961501000  | -0.991230000 | 4.174717000  |
| C       | 1.110710000  | -2.675980000 | -1.233514000 | C | -3.045913000  | -2.020763000 | 3.880772000  |
| H       | 1.116548000  | -1.687493000 | -0.755181000 | C | -1.833385000  | -1.729676000 | 3.227097000  |
| C       | 1.328285000  | -2.446464000 | -2.746635000 | C | 3.233441000   | 1.015225000  | 0.731803000  |
| H       | 1.453861000  | -3.391106000 | -3.291950000 | C | 3.741356000   | 2.297648000  | 0.413670000  |
| H       | 2.241622000  | -1.857119000 | -2.903376000 | C | 4.550460000   | 2.989744000  | 1.331920000  |
| H       | 0.487551000  | -1.901590000 | -3.189060000 | C | 4.849708000   | 2.419986000  | 2.586245000  |
| C       | 2.289865000  | -3.489397000 | -0.630639000 | C | 4.329620000   | 1.152723000  | 2.914654000  |
| H       | 2.328482000  | -4.495523000 | -1.069331000 | C | 3.530231000   | 0.450732000  | 1.993331000  |
| H       | 2.189616000  | -3.602025000 | 0.456810000  | H | -4.808967000  | 1.619100000  | -0.506442000 |
| H       | 3.246306000  | -2.989827000 | -0.833837000 | H | -5.8891763000 | -0.621925000 | -0.235493000 |
| C       | -3.020252000 | -3.198088000 | 1.825387000  | H | -4.440217000  | -2.655931000 | -0.098756000 |
| C       | -2.423759000 | -2.554172000 | 2.477789000  | H | -2.244341000  | 4.235692000  | -0.945513000 |
| C       | -3.494491000 | -4.406721000 | 2.672532000  | H | -3.573363000  | 3.550360000  | 0.011154000  |
| H       | -4.194212000 | -5.044965000 | 2.117695000  | H | -3.492782000  | 3.250427000  | -1.734313000 |
| H       | -4.016638000 | -4.048247000 | 3.568998000  | H | -2.868243000  | -4.227666000 | 0.607111000  |
| H       | -2.653363000 | -5.035288000 | 2.995563000  | H | -1.482273000  | -4.844514000 | -0.321241000 |
| C       | -4.232432000 | -2.344961000 | 1.362621000  | H | -2.913525000  | -4.229636000 | -1.165399000 |
| H       | -4.888312000 | -2.917880000 | 0.693508000  | H | 1.722909000   | 5.109641000  | -3.017870000 |
| H       | -3.901578000 | -1.446854000 | 0.830155000  | H | 2.295441000   | 6.447642000  | -1.002519000 |
| H       | -4.818211000 | -2.021791000 | 2.232615000  | H | 1.408190000   | 5.773608000  | 1.218094000  |
| N       | -0.355596000 | -1.980890000 | 1.122402000  | H | -0.445448000  | 2.047983000  | -3.002662000 |
| N       | 0.727779000  | 0.119598000  | 2.235296000  | H | 1.995020000   | 1.704647000  | -3.314262000 |
| N       | 0.056622000  | 2.240921000  | 0.862122000  | H | 2.093526000   | 3.192986000  | -4.290174000 |
| O       | -2.015138000 | 0.235348000  | 2.312168000  | H | 1.135752000   | 1.808438000  | -4.860802000 |
| O       | -1.886353000 | -0.528972000 | 3.434812000  | H | -1.579182000  | 4.182064000  | -3.713278000 |
| C       | 6.782188000  | -1.687374000 | -2.560356000 | H | -0.089912000  | 4.693274000  | -4.529234000 |
| H       | 7.243087000  | -2.169137000 | -3.419282000 | H | -0.954787000  | 3.248750000  | -5.091753000 |
| C       | 5.632132000  | -0.885620000 | -2.735295000 | H | -0.645505000  | 2.708330000  | 1.841697000  |
| H       | 5.208768000  | -0.749771000 | -3.726894000 | H | -1.689908000  | 4.446768000  | 3.299745000  |
| C       | 5.035358000  | -0.262606000 | -1.630100000 | H | -0.842112000  | 5.732490000  | 2.420516000  |
| H       | 4.152314000  | 0.356889000  | -1.755478000 | H | -2.099197000  | 4.791556000  | 1.602505000  |
| C       | 5.581179000  | -0.433600000 | -0.323854000 | H | 0.504155000   | 3.321685000  | 3.914953000  |
| S       | 4.825796000  | 0.355441000  | 1.091278000  | H | 1.430208000   | 4.588829000  | 3.087206000  |
| C       | 6.742244000  | -1.245905000 | -0.162070000 | H | 1.682918000   | 2.880229000  | 2.668480000  |
| H       | 7.158742000  | -1.375224000 | 0.832852000  | H | 1.659869000   | -5.239396000 | -3.501177000 |
| C       | 7.334649000  | -1.864890000 | -1.271901000 | H | 3.206597000   | -6.165619000 | -1.795375000 |
| H       | 8.219626000  | -2.481842000 | -1.139998000 | H | 3.072499000   | -5.367058000 | 0.553784000  |
| O       | -1.351033000 | 0.044186000  | -1.119961000 | H | -0.951634000  | -2.637376000 | -2.879991000 |
| S       | -2.382005000 | 0.752943000  | -2.239974000 | H | -0.109731000  | -2.317587000 | -5.161185000 |
| O       | -3.641289000 | 1.500702000  | -1.554779000 | H | 1.123664000   | -1.873773000 | -3.969724000 |
| O       | -1.579135000 | 1.465673000  | -3.448791000 | H | 1.255666000   | -3.416797000 | -4.857129000 |
| C       | -3.130723000 | -0.930070000 | -3.039674000 | H | -1.824014000  | -4.135423000 | -4.631000000 |
| F       | -4.098430000 | -0.606742000 | -3.975301000 | H | -1.740740000  | -5.052602000 | -3.107854000 |
| F       | -2.125808000 | -1.645709000 | -3.669338000 | H | -0.516966000  | -5.301673000 | -4.362452000 |
| F       | -3.703004000 | -1.715648000 | -2.057570000 | H | 0.852584000   | -2.605725000 | 1.720434000  |
|         |              |              |              | H | 2.654268000   | -2.885638000 | 3.292117000  |
|         |              |              |              | H | 3.392850000   | -2.708378000 | 1.682350000  |
|         |              |              |              | H | 3.300441000   | -4.304625000 | 2.454691000  |
|         |              |              |              | H | 0.503533000   | -4.314519000 | 3.537207000  |
|         |              |              |              | H | 1.058604000   | -5.597260000 | 2.441318000  |
|         |              |              |              | H | -0.452091000  | -4.738345000 | 2.096889000  |
|         |              |              |              | H | -2.186091000  | 1.654833000  | 2.920327000  |
|         |              |              |              | H | -4.333413000  | 1.142305000  | 4.056223000  |
|         |              |              |              | H | -4.893687000  | -1.213980000 | 4.688913000  |
|         |              |              |              | H | -3.265999000  | -3.045748000 | 4.173257000  |
|         |              |              |              | H | -1.121640000  | -2.523919000 | 3.029568000  |
|         |              |              |              | H | 3.504222000   | 2.740097000  | -0.549635000 |
| Asph, 5 |              |              |              |   |               |              |              |
| Fe      | 0.000638000  | -0.093498000 | -0.300613000 |   |               |              |              |
| S       | 0.132852000  | -0.020496000 | 2.110701000  |   |               |              |              |
| S       | 2.328287000  | 0.091204000  | -0.565861000 |   |               |              |              |
| N       | -0.765272000 | 2.067312000  | -0.547191000 |   |               |              |              |
| N       | -2.029902000 | -0.294349000 | -0.294358000 |   |               |              |              |

|   |              |              |              |
|---|--------------|--------------|--------------|
| H | 4.940200000  | 3.970876000  | 1.069723000  |
| H | 5.475979000  | 2.955920000  | 3.296167000  |
| H | 4.547747000  | 0.707001000  | 3.882693000  |
| H | 3.135698000  | -0.525272000 | 2.248842000  |
| O | 0.094637000  | -0.300617000 | -2.319905000 |
| O | -1.071254000 | -0.104524000 | -3.005956000 |

**C<sub>Cl,Cl,5</sub>**

|    |              |              |              |
|----|--------------|--------------|--------------|
| Fe | -0.001018000 | -0.462589000 | 0.075919000  |
| C  | -2.419160000 | -2.051220000 | -0.946209000 |
| C  | -1.207516000 | -2.854860000 | -1.304138000 |
| C  | -1.255578000 | -4.145486000 | -1.870229000 |
| H  | -2.203840000 | -4.618269000 | -2.096180000 |
| C  | -0.047313000 | -4.816552000 | -2.125567000 |
| H  | -0.059686000 | -5.812774000 | -2.558154000 |
| C  | 1.176603000  | -4.203090000 | -1.807004000 |
| H  | 2.111861000  | -4.720693000 | -1.983542000 |
| C  | 1.160220000  | -2.910985000 | -1.242935000 |
| C  | 2.387764000  | -2.165515000 | -0.819285000 |
| C  | -3.775873000 | -2.649803000 | -1.247195000 |
| H  | -4.577736000 | -1.964429000 | -0.971567000 |
| H  | -3.905428000 | -3.579617000 | -0.677146000 |
| H  | -3.873989000 | -2.894528000 | -2.311974000 |
| C  | 3.729121000  | -2.829567000 | -1.040473000 |
| H  | 3.866767000  | -3.105051000 | -2.093207000 |
| H  | 3.790546000  | -3.749244000 | -0.442978000 |
| H  | 4.546638000  | -2.172730000 | -0.742024000 |
| C  | -3.317207000 | 0.002864000  | -0.052296000 |
| C  | -3.813733000 | 0.871125000  | -1.067539000 |
| C  | -4.885503000 | 1.726325000  | -0.735951000 |
| H  | -5.280388000 | 2.396003000  | -1.495192000 |
| C  | -5.444104000 | 1.737796000  | 0.549614000  |
| H  | -6.268055000 | 2.408285000  | 0.781407000  |
| C  | -4.928173000 | 0.885399000  | 1.534747000  |
| H  | -5.355181000 | 0.898797000  | 2.534090000  |
| C  | -3.859293000 | 0.006550000  | 1.261853000  |
| C  | -3.253614000 | 0.918854000  | -2.495672000 |
| H  | -2.329255000 | 0.333980000  | -2.531721000 |
| C  | -4.252561000 | 0.307074000  | -3.517193000 |
| H  | -4.506943000 | -0.732435000 | -3.276105000 |
| H  | -3.823166000 | 0.328497000  | -4.527956000 |
| H  | -5.188704000 | 0.880262000  | -3.537712000 |
| C  | -2.890964000 | 2.365908000  | -2.920285000 |
| H  | -3.786219000 | 2.995424000  | -3.008979000 |

|    |              |              |              |
|----|--------------|--------------|--------------|
| H  | -2.391337000 | 2.355725000  | -3.897782000 |
| H  | -2.209490000 | 2.827456000  | -2.199852000 |
| C  | -3.351199000 | -0.912556000 | 2.374044000  |
| H  | -2.471595000 | -1.453231000 | 2.017503000  |
| C  | -2.885830000 | -0.104444000 | 3.611722000  |
| H  | -2.115996000 | 0.621993000  | 3.329922000  |
| H  | -2.451662000 | -0.784658000 | 4.355233000  |
| H  | -3.717658000 | 0.434294000  | 4.086720000  |
| C  | -4.423972000 | -1.962991000 | 2.768910000  |
| H  | -5.324468000 | -1.485228000 | 3.178501000  |
| H  | -4.021703000 | -2.638726000 | 3.534836000  |
| H  | -4.732655000 | -2.571389000 | 1.906943000  |
| C  | 3.330516000  | -0.155731000 | 0.130185000  |
| C  | 3.823896000  | -0.211481000 | 1.462134000  |
| C  | 4.906536000  | 0.626932000  | 1.801667000  |
| H  | 5.294374000  | 0.597910000  | 2.816526000  |
| C  | 5.486342000  | 1.490641000  | 0.863451000  |
| H  | 6.319570000  | -2.128859000 | 1.147283000  |
| C  | 4.981558000  | 1.530394000  | -0.443728000 |
| H  | 5.429343000  | 2.204793000  | -1.168491000 |
| C  | 3.897487000  | 0.720121000  | -0.840533000 |
| C  | 3.245181000  | -1.137894000 | 2.533975000  |
| H  | 2.409071000  | -1.699954000 | 2.111407000  |
| C  | 2.661702000  | -0.323625000 | 3.717657000  |
| H  | 3.439240000  | 0.258949000  | 4.231115000  |
| H  | 2.203616000  | -1.003496000 | 4.446925000  |
| H  | 1.886070000  | 0.364747000  | 3.365855000  |
| C  | 4.301451000  | -2.160750000 | 3.030644000  |
| H  | 5.149898000  | -1.662294000 | 3.518648000  |
| H  | 4.701124000  | -2.765107000 | 2.203924000  |
| H  | 3.846489000  | -2.841879000 | 3.761559000  |
| C  | 3.406714000  | 0.807691000  | -2.291874000 |
| H  | 2.454440000  | 0.275190000  | -2.373610000 |
| C  | 4.416326000  | 0.140677000  | -3.267680000 |
| H  | 5.384632000  | 0.657518000  | -3.239783000 |
| H  | 4.038187000  | 0.189200000  | -4.297802000 |
| H  | 4.596302000  | -0.912694000 | -3.019218000 |
| C  | 3.145601000  | 2.272774000  | -2.727090000 |
| H  | 4.077351000  | 2.851836000  | -2.774795000 |
| H  | 2.459394000  | 2.771591000  | -2.036361000 |
| H  | 2.690100000  | 2.290973000  | -3.725714000 |
| N  | 2.203053000  | -1.004565000 | -0.257467000 |
| N  | -0.015766000 | -2.279618000 | -1.028003000 |
| N  | -2.211202000 | -0.901651000 | -0.368853000 |
| O  | 0.056909000  | 0.382546000  | -1.755580000 |
| O  | 0.093330000  | 1.640091000  | -2.158141000 |
| Cl | -0.075542000 | -2.092912000 | 1.913165000  |
| Cl | 0.012283000  | 1.529030000  | 1.192735000  |
